# Supplementary material
Source: PubMed Central journal article supplement (PMC6461448)
Supplement: NIHMS950588-supplement-Supplemental_figure_1.pdf [file NIHMS950588-supplement-Supplemental_figure_1.pdf]

# Supplemental Figure 1

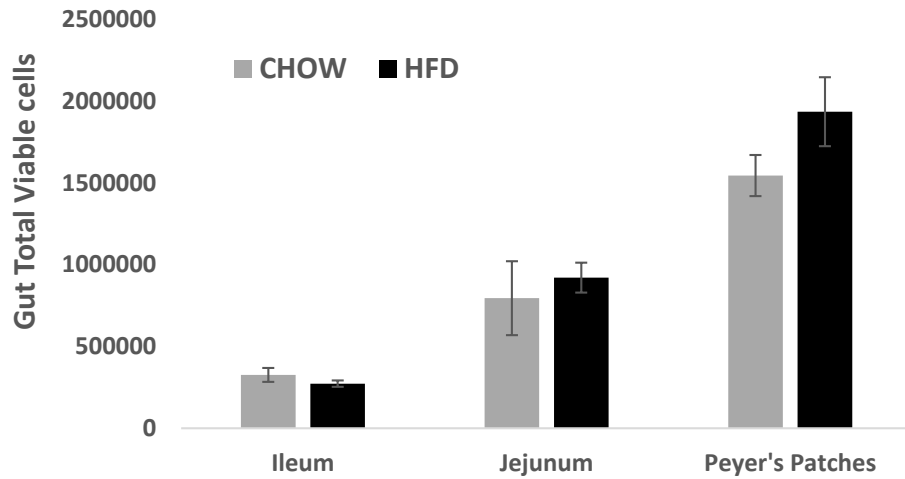

7 weeks of HFD did not alter total viable cell number in ileum, jejunum or Peyer's patch samples.
